# Supplementary material for: Direct high-precision radon quantification for interpreting high frequency greenhouse gas measurements
Source: Copernicus journal article supplement (doi:10.5194/amt-2024-54), 2024-06-11
Supplement: Supplementary file [file amt-2024-54-AC3-supplement.pdf]

**Dafina Kikaj, Senior Scientist  
National Physical Laboratory  
Teddington, UK**

**15<sup>th</sup> October 2024**

**Dr David Griffith, Editor  
Atmospheric Measurement Techniques**

Dear Dr Griffith,

Please find below our response to your comments on our paper: **“Direct high-precision radon quantification for interpreting high frequency greenhouse gas measurements”**.

We would like to thank you for taking the time to look over our manuscript and provide us with comprehensive constructive feedback.

Best regards,

Dafina Kikaj  
(on behalf of all co-authors)

With apologies for the long response time, 2 referees have now submitted reports which recommend acceptance in AMT, require no major revisions but request a number of valid minor and technical corrections or enhancements. I encourage the authors to incorporate responses to these comments and prepare a revised manuscript. No major revisions are required.

In addition I have some further, minor technical suggestions that could be included at this stage:

Abstract (and conclusion) - use of "precision" when in most case you mean "accuracy" or sometimes "accuracy and precision". Please revise this usage.

**Thank you. We acknowledge this distinction and have made the necessary revisions in the manuscript to ensure that "accuracy" and "precision" are used appropriately.**

L62: it would be useful here to specify  $^{222}\text{Rn}$  rather than just Rn to distinguish from other isotopes in this context

**Corrected!**

L200 and many instances thereafter: please use  $\text{L min}^{-1}$  not  $\text{L m}^{-1}$  for flows. In SI "m" is the symbol for metre. There also cases further on where you have correctly used  $\text{L min}^{-1}$ . Reviewers also noticed this, please check the MS for all instances and correct them.

**We apologise for this omit. It is corrected now throughout the whole manuscript.**

p14: Flows are given as  $\text{m s}^{-1}$ . Is this really a linear flow rate of metre/s? Flow rate is usually measured as vol/time, but I do not think you mean  $\text{m}^3 \text{s}^{-1}$ . Reviewers also noted this, please clarify.

**This is a linear flow rate. We have corrected this now.**

**L366 I was confused by your use of a micro flow meter to estimate over pressure in Pa. Can you clarify this, please?**

The main detector delay volume (and entire inlet line downstream of the Becker stack blower) is kept at positive pressure with respect to ambient conditions (usually between 100-200 Pa). This overpressure minimises the likelihood that ambient radon/thoron progeny at high ground-level concentrations will directly enter the detector in the event of a leak developing in the detector's delay volume or inlet line.

During normal operation the detector's overpressure is monitored using a micro mass airflow sensor located within the data logger box (via the ta port in the detector's bulkhead; Figure 9). At the time of commissioning a hand-held differential pressure sensor is usually used to relate flow rate reported by the micro mass flow sensor to a differential pressure between the tank and ambient atmosphere for a range of overpressure values (between 80 – 180 Pa).
